# Supplementary material for: Differences in regions of interest to identify deeply invasive colorectal cancers: Computer-aided diagnosis vs expert endoscopists
Source: PubMed Central journal article supplement — Endosc Int Open. 2024 Nov 7;12(11):E1260–6. doi: 10.1055/a-2401-6611 (PMC11543284; doi:10.1055/a-2401-6611), 2024-11-07
Supplement: 10-1055-a-2401-6611_24097566.pdf [file 10-1055-a-2401-6611_24097566.pdf]

## Supplementary material

**Supplementary Table 1** ROI, Intersection, Union and IoU between endoscopists and CAD.

|                                   | <b>Pixel count</b>  | <b>P value</b> |
|-----------------------------------|---------------------|----------------|
| ROI of endoscopist, median [IQR]  | 300k [208k-440k]    | < 0.0001*      |
| ROI of CADx, median [IQR]         | 168k [108k-227k]    |                |
| Intersection of ROI, median [IQR] | 84k [15k-124k]      |                |
| Union of ROI, median [IQR]        | 404k [298k-596k]    |                |
| IoU, median [IQR]                 | 0.198 [0.024-0.349] |                |

ROI, region of interest; IoU, intersection over union; IQR, interquartile range; CAD, computer-aided diagnosis

The abbreviation 'k' is used to represent the numerical value of 1000.

\* Wilcoxon signed-rank sum test.
